# Supplementary material for: Encapsulation and Adsorption of Halogens into Single-Walled Carbon Nanotubes
Source: MDPI journal article supplement (doi:10.3390/micro1010011), 2021-08-21
Supplement: s1 [file s1]

# Encapsulation and Adsorption of Halogens into Single Walled Carbon Nanotubes

Navaratnarajah Kuganathan <sup>1,\*</sup> and Sashikesh Ganeshalingam <sup>2</sup>

<sup>1</sup> Department of Materials, Imperial College London, London SW7 2AZ, UK

<sup>2</sup> Department of Chemistry, University of Jaffna, Sir. Pon Ramanathan Road, Thirunelvely, Jaffna 40000, Sri Lanka; sashikesh@gmail.com

\* Correspondence: n.kuganathan@imperial.ac.uk

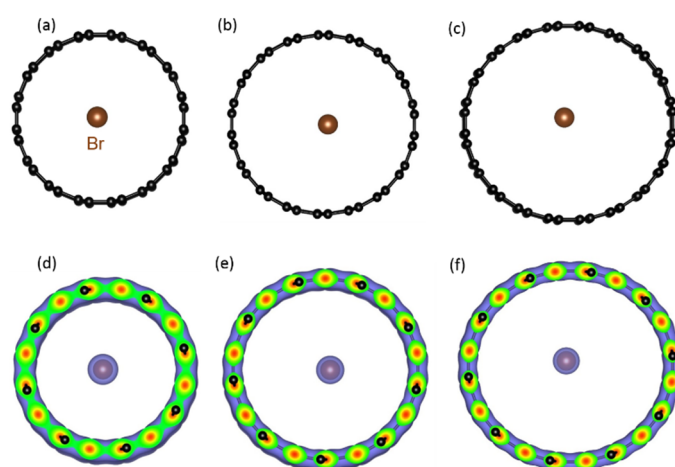

**Figure S1.** Relaxed structures of (a) Br@(8,8), Br@(9,9) and Br@(10,10). Corresponding charge density plots (d-f) are also shown.

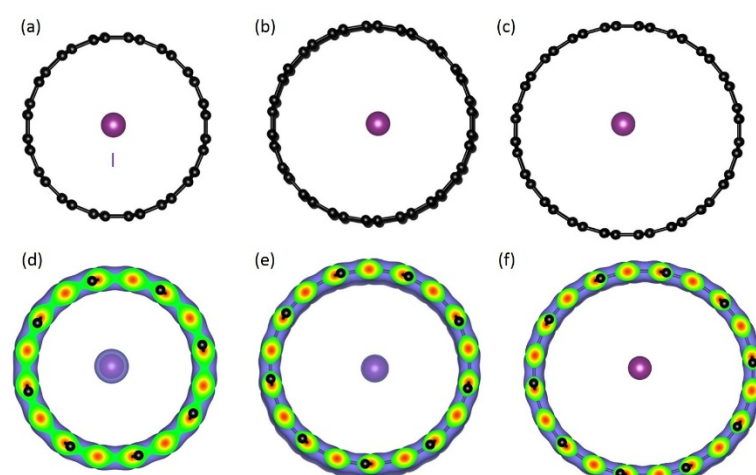

**Figure S2.** Relaxed structures of (a) I@(8,8), I@(9,9) and I@(10,10). Corresponding charge density plots (d-f) are also shown.
